# Supplementary material for: Risk of Dementia in Long-Term Benzodiazepine Users: Evidence from a Meta-Analysis of Observational Studies
Source: PubMed Central journal article supplement — J Clin Neurol. 2018 Oct 26;15(1):9–19. doi: 10.3988/jcn.2019.15.1.9 (PMC6325366; doi:10.3988/jcn.2019.15.1.9), 2018-10-26
Supplement: jcn-15-9-s001.pdf [file jcn-15-9-s001.pdf]

## SUPPLEMENTARY MATERIAL 1

### Search strategy

Medline (via Ovid) [Date of search: 22 Jan. 2018]

| S.No. | Keywords                                                                                                                                                                                                                                                                                                                                                  | Hits      |
|-------|-----------------------------------------------------------------------------------------------------------------------------------------------------------------------------------------------------------------------------------------------------------------------------------------------------------------------------------------------------------|-----------|
| #1    | exp Benzodiazepines/                                                                                                                                                                                                                                                                                                                                      | 28,734    |
| #2    | Benzodiazepines.ab,ti.                                                                                                                                                                                                                                                                                                                                    | 10,675    |
| #3    | (Alprazolam or Benzodiazepinones or Anthramycin or Bromazepam or Clonazepam or Devazepide or Diazepam or Flumazenil or Flunitrazepam or Flurazepam or Lorazepam or Nitrazepam or Oxazepam or Pirenzepine or Prazepam or Temazepam or Chlordiazepoxide or Clorazepate Dipotassium or Estazolam or Medazepam or Midazolam or Triazolam).ab,ti.              | 24,820    |
| #4    | #1 or #2 or #3                                                                                                                                                                                                                                                                                                                                            | 44,923    |
| #5    | exp Dementia/ or exp Dementia, Vascular/ or exp Frontotemporal Dementia/ or exp Dementia, Multi-Infarct/                                                                                                                                                                                                                                                  | 110,121   |
| #6    | (Dementia or Cognitive Defect or Cognitive Impairment or Cognition Impairment).ab,ti.                                                                                                                                                                                                                                                                     | 101,718   |
| #7    | (Dementias or Amentia or Amentias or Senile Paranoid Dementia or Dementias, Senile Paranoid or Paranoid Dementia, Senile or Paranoid Dementias, Senile or Senile Paranoid Dementias or Familial Dementia or Dementia, Familial or Dementias, Familial or Familial Dementias).ab,ti.                                                                       | 3,643     |
| #8    | #5 or #6 or #7                                                                                                                                                                                                                                                                                                                                            | 162,896   |
| #9    | exp Risk/ or exp Logistic Models/ or exp Protective Factors/ or exp Risk Assessment/ or exp Adverse Outcome Pathways/ or exp Risk Factors/ or exp Odds Ratio/                                                                                                                                                                                             | 896,188   |
| #10   | (Risk or Logistic Models or Protective Factors or Risk Assessment or Adverse Outcome Pathways or Risk Factors or Odds Ratio).ab,ti.                                                                                                                                                                                                                       | 1,561,857 |
| #11   | (Odds Ratios or Cross-Product Ratio or Cross Product Ratio or Cross-Product Ratios or Ratio, Cross-Product or Ratios, Cross-Product or Relative Odds or Odds, Relative or Risk Ratio or Ratio, Risk or Ratios, Risk or Risk Ratios or Hazard or Increased Risk or Decreased Risk or Higher Risk or Lower Risk or Reduced Risk or Significant Risk).ab,ti. | 414,172   |
| #12   | #9 or #10 or #11                                                                                                                                                                                                                                                                                                                                          | 1,948,853 |
| #13   | #4 and #8 and #12                                                                                                                                                                                                                                                                                                                                         | 344       |
| #14   | limit #13 to (english language and humans)                                                                                                                                                                                                                                                                                                                | 256       |

## Search strategy

Embase (Via Embase.com) [Date of search: 22 Jan. 2018]

| S.No. | Keywords                                                                                                                                                                                                                                                                                                                                                                                                                                                                                                                                                                                                                                                                                                                                                                                                                                                                                                                                                                                                                                                                                                                                                                                                                                                                                                                                                                                                                                                                                                                                                                                                                                 | Hits      |
|-------|------------------------------------------------------------------------------------------------------------------------------------------------------------------------------------------------------------------------------------------------------------------------------------------------------------------------------------------------------------------------------------------------------------------------------------------------------------------------------------------------------------------------------------------------------------------------------------------------------------------------------------------------------------------------------------------------------------------------------------------------------------------------------------------------------------------------------------------------------------------------------------------------------------------------------------------------------------------------------------------------------------------------------------------------------------------------------------------------------------------------------------------------------------------------------------------------------------------------------------------------------------------------------------------------------------------------------------------------------------------------------------------------------------------------------------------------------------------------------------------------------------------------------------------------------------------------------------------------------------------------------------------|-----------|
| #1    | 'dementia'/exp                                                                                                                                                                                                                                                                                                                                                                                                                                                                                                                                                                                                                                                                                                                                                                                                                                                                                                                                                                                                                                                                                                                                                                                                                                                                                                                                                                                                                                                                                                                                                                                                                           | 301,758   |
| #2    | dementia: ab,ti                                                                                                                                                                                                                                                                                                                                                                                                                                                                                                                                                                                                                                                                                                                                                                                                                                                                                                                                                                                                                                                                                                                                                                                                                                                                                                                                                                                                                                                                                                                                                                                                                          | 124,801   |
| #3    | 'cognitive defect'/exp                                                                                                                                                                                                                                                                                                                                                                                                                                                                                                                                                                                                                                                                                                                                                                                                                                                                                                                                                                                                                                                                                                                                                                                                                                                                                                                                                                                                                                                                                                                                                                                                                   | 405,463   |
| #4    | 'cognitive defect': ab,ti                                                                                                                                                                                                                                                                                                                                                                                                                                                                                                                                                                                                                                                                                                                                                                                                                                                                                                                                                                                                                                                                                                                                                                                                                                                                                                                                                                                                                                                                                                                                                                                                                | 113       |
| #5    | 'cognitive impairment': ab,ti                                                                                                                                                                                                                                                                                                                                                                                                                                                                                                                                                                                                                                                                                                                                                                                                                                                                                                                                                                                                                                                                                                                                                                                                                                                                                                                                                                                                                                                                                                                                                                                                            | 66,636    |
| #6    | 'cognition impairment': ab,ti                                                                                                                                                                                                                                                                                                                                                                                                                                                                                                                                                                                                                                                                                                                                                                                                                                                                                                                                                                                                                                                                                                                                                                                                                                                                                                                                                                                                                                                                                                                                                                                                            | 328       |
| #7    | 'alzheimer disease'/exp OR 'cadasil'/exp OR 'diffuse lewy body disease'/exp OR 'diffuse neurofibrillary tangles with calcification'/exp OR 'frontotemporal dementia'/exp OR 'hiv associated dementia'/exp OR 'huntington chorea'/exp OR 'kluber bucy syndrome'/exp OR 'mental deterioration'/exp OR 'mixed depression and dementia'/exp OR 'multiinfarct dementia'/exp OR 'neuronal ceroid lipofuscinosis'/exp OR 'pick presenile dementia'/exp OR 'presenile dementia'/exp OR 'prion disease'/exp OR 'pseudodementia'/exp OR 'rett syndrome'/exp OR 'senile dementia'/exp OR 'tauopathy'/exp                                                                                                                                                                                                                                                                                                                                                                                                                                                                                                                                                                                                                                                                                                                                                                                                                                                                                                                                                                                                                                            | 234,344   |
| #8    | 'alzheimer disease': ab,ti OR 'cadasil': ab,ti OR 'diffuse lewy body disease': ab,ti OR 'diffuse neurofibrillary tangles with calcification': ab,ti OR 'frontotemporal dementia': ab,ti OR 'hiv associated dementia': ab,ti OR 'huntington chorea': ab,ti OR 'kluber bucy syndrome': ab,ti OR 'mental deterioration': ab,ti OR 'mixed depression and dementia': ab,ti OR 'multiinfarct dementia': ab,ti OR 'neuronal ceroid lipofuscinosis': ab,ti OR 'pick presenile dementia': ab,ti OR 'presenile dementia': ab,ti OR 'prion disease': ab,ti OR 'pseudodementia': ab,ti OR 'rett syndrome': ab,ti OR 'senile dementia': ab,ti OR 'tauopathy': ab,ti                                                                                                                                                                                                                                                                                                                                                                                                                                                                                                                                                                                                                                                                                                                                                                                                                                                                                                                                                                                   | 44,994    |
| #9    | #1 OR #2 OR #3 OR #4 OR #5 OR #6 OR #7 OR #8                                                                                                                                                                                                                                                                                                                                                                                                                                                                                                                                                                                                                                                                                                                                                                                                                                                                                                                                                                                                                                                                                                                                                                                                                                                                                                                                                                                                                                                                                                                                                                                             | 429,519   |
| #10   | 'arfendazam': ab,ti OR 'benzodiazepin 2 one derivative': ab,ti OR 'benzodiazepine': ab,ti OR 'bromazepam': ab,ti OR 'camazepam': ab,ti OR 'chlordiazepoxide': ab,ti OR 'cinolazepam': ab,ti OR 'clobazam': ab,ti OR 'clonazepam': ab,ti OR 'lorazepate': ab,ti OR 'clorazepate dipotassium': ab,ti OR 'clorazepate potassium': ab,ti OR 'dealkylflurazepam': ab,ti OR 'delorazepam': ab,ti OR 'demoxepam': ab,ti OR 'devazepide': ab,ti OR 'diazepam': ab,ti OR 'diazepam derivative': ab,ti OR 'doxefazepam': ab,ti OR 'ethyl loflazepate': ab,ti OR 'fludiazepam': ab,ti OR 'flunitrazepam': ab,ti OR 'flurazepam': ab,ti OR 'flutoprazepam': ab,ti OR 'fosazepam': ab,ti OR 'gidazepam': ab,ti OR 'girisopam': ab,ti OR 'halazepam': ab,ti OR 'loflazepate': ab,ti OR 'lorazepam': ab,ti OR 'lormetazepam': ab,ti OR 'lotrafiban': ab,ti OR 'meclonazepam': ab,ti OR 'medazepam': ab,ti OR 'metaclazepam': ab,ti OR 'midazolam': ab,ti OR 'nitrosochlordiazepoxide': ab,ti OR 'nastorazepide': ab,ti OR 'nerisopam': ab,ti OR 'netazepide': ab,ti OR 'nimetazepam': ab,ti OR 'nitrazepam': ab,ti OR 'norchlordiazepoxide': ab,ti OR 'norclobazam': ab,ti OR 'nordazepam': ab,ti OR 'norfludiazepam': ab,ti OR 'norflunitrazepam': ab,ti OR 'oxazepam': ab,ti OR 'phenazepam': ab,ti OR 'pinazepam': ab,ti OR 'prazepam': ab,ti OR 'quazepam': ab,ti OR 'talampanel': ab,ti OR 'talirine': ab,ti OR 'tampramine': ab,ti OR 'tarazepide': ab,ti OR 'temazepam': ab,ti OR 'tetrazepam': ab,ti OR 'tibezonium iodide': ab,ti OR 'tifluadom': ab,ti OR 'tofisopam': ab,ti OR 'tomaymycin': ab,ti OR 'tuclazepam': ab,ti OR 'uxepam': ab,ti | 75,896    |
| #11   | 'benzodiazepine derivative': ab,ti OR 'benzodiazepine derivative'/exp                                                                                                                                                                                                                                                                                                                                                                                                                                                                                                                                                                                                                                                                                                                                                                                                                                                                                                                                                                                                                                                                                                                                                                                                                                                                                                                                                                                                                                                                                                                                                                    | 201,769   |
| #12   | 'benzodiazepines': ab,ti                                                                                                                                                                                                                                                                                                                                                                                                                                                                                                                                                                                                                                                                                                                                                                                                                                                                                                                                                                                                                                                                                                                                                                                                                                                                                                                                                                                                                                                                                                                                                                                                                 | 24,293    |
| #13   | #10 OR #11 OR #12                                                                                                                                                                                                                                                                                                                                                                                                                                                                                                                                                                                                                                                                                                                                                                                                                                                                                                                                                                                                                                                                                                                                                                                                                                                                                                                                                                                                                                                                                                                                                                                                                        | 214,421   |
| #14   | 'risk'/exp OR 'logistic models'/exp OR 'protective factors'/exp OR 'risk assessment'/exp OR 'adverse outcome pathways'/exp OR 'risk factors'/exp OR 'odds ratio'/exp                                                                                                                                                                                                                                                                                                                                                                                                                                                                                                                                                                                                                                                                                                                                                                                                                                                                                                                                                                                                                                                                                                                                                                                                                                                                                                                                                                                                                                                                     | 2,477,596 |
| #15   | 'risk': ab,ti OR 'logistic models': ab,ti OR 'protective factors': ab,ti OR 'risk assessment': ab,ti OR 'adverse outcome pathways': ab,ti OR 'risk factors': ab,ti OR 'odds ratio': ab,ti                                                                                                                                                                                                                                                                                                                                                                                                                                                                                                                                                                                                                                                                                                                                                                                                                                                                                                                                                                                                                                                                                                                                                                                                                                                                                                                                                                                                                                                | 2,500,907 |
| #16   | 'odds ratios': ab,ti OR 'cross-product ratio': ab,ti OR 'cross product ratio': ab,ti OR 'cross-product ratios': ab,ti OR 'ratio, cross-product': ab,ti OR 'ratios, cross-product': ab,ti OR 'relative odds': ab,ti OR 'odds, relative': ab,ti OR 'risk ratio': ab,ti OR 'ratio, risk': ab,ti OR 'ratios, risk': ab,ti OR 'risk ratios': ab,ti OR 'hazard': ab,ti OR 'increased risk': ab,ti OR 'decreased risk': ab,ti OR 'higher risk': ab,ti OR 'lower risk': ab,ti OR 'reduced risk': ab,ti OR 'significant risk': ab,ti                                                                                                                                                                                                                                                                                                                                                                                                                                                                                                                                                                                                                                                                                                                                                                                                                                                                                                                                                                                                                                                                                                              | 650,837   |
| #17   | #14 OR #15 OR #16                                                                                                                                                                                                                                                                                                                                                                                                                                                                                                                                                                                                                                                                                                                                                                                                                                                                                                                                                                                                                                                                                                                                                                                                                                                                                                                                                                                                                                                                                                                                                                                                                        | 3,571,541 |
| #18   | #9 AND #13 AND #17                                                                                                                                                                                                                                                                                                                                                                                                                                                                                                                                                                                                                                                                                                                                                                                                                                                                                                                                                                                                                                                                                                                                                                                                                                                                                                                                                                                                                                                                                                                                                                                                                       | 2,884     |
| #19   | #9 AND #13 AND #17 AND [humans]/lim AND [english]/lim AND [embase]/lim                                                                                                                                                                                                                                                                                                                                                                                                                                                                                                                                                                                                                                                                                                                                                                                                                                                                                                                                                                                                                                                                                                                                                                                                                                                                                                                                                                                                                                                                                                                                                                   | 2,524     |

## Search strategy

Cochrane Library [Date of search: 22 Jan. 2018]

| S.No. | Keywords                                                   | Hits   |
|-------|------------------------------------------------------------|--------|
| #1    | MeSH descriptor: [Dementia] explode all trees              | 4,690  |
| #2    | MeSH descriptor: [Cognitive Dysfunction] explode all trees | 395    |
| #3    | cognitive impairment                                       | 7,586  |
| #4    | declined cognition                                         | 306    |
| #5    | cognition impairment                                       | 3,669  |
| #6    | #1 or #2 or #3 or #4 or #5                                 | 12,095 |
| #7    | MeSH descriptor: [Benzodiazepines] explode all trees       | 8,005  |
| #8    | #6 and #7                                                  | 217    |
