# Supplementary material for: Risk of Dementia in Long-Term Benzodiazepine Users: Evidence from a Meta-Analysis of Observational Studies
Source: PubMed Central journal article supplement — J Clin Neurol. 2018 Oct 26;15(1):9–19. doi: 10.3988/jcn.2019.15.1.9 (PMC6325366; doi:10.3988/jcn.2019.15.1.9), 2018-10-26
Supplement: jcn-15-9-s002.pdf [file jcn-15-9-s002.pdf]

## SUPPLEMENTARY MATERIAL 2

### NOS quality rating of included studies

#### NOS quality assessment of four cohort studies included in the meta-analysis

| Study name                                | Selection                                |                                     |                           | Comparability                                                            |                                                                 | Outcome               |                                           |                            | Total |
|-------------------------------------------|------------------------------------------|-------------------------------------|---------------------------|--------------------------------------------------------------------------|-----------------------------------------------------------------|-----------------------|-------------------------------------------|----------------------------|-------|
|                                           | Representativeness of the exposed cohort | Selection of the non exposed cohort | Ascertainment of exposure | Demonstration that outcome of interest was not present at start of study | Comparability of cohorts on the basis of the design or analysis | Assessment of outcome | Was F/u long enough for outcomes to occur | Adequacy of F/u of cohorts |       |
| Shash et al. 2016 <sup>9</sup>            | *                                        | -                                   | *                         | *                                                                        | *                                                               | *                     | *                                         | *                          | 7     |
| Gray et al. 2016 <sup>8</sup>             | *                                        | *                                   | *                         | *                                                                        | *                                                               | *                     | *                                         | *                          | 8     |
| Gallacher et al. 2012 <sup>2</sup>        | -                                        | *                                   | -                         | *                                                                        | *                                                               | *                     | *                                         | *                          | 6     |
| Billioti de Gage et al. 2012 <sup>6</sup> | *                                        | *                                   | -                         | *                                                                        | *                                                               | *                     | *                                         | *                          | 7     |

\*Indicates one point, †Indicates no points.

F/u: follow-up, NOS: New Castle Ottawa Scale.

## NOS quality rating of included studies

### NOS quality assessment of six case control studies included in the meta-analysis

| Study name                        | Selection                        |                                 |                       | Comparability          |                                                 | Exposure               |                                                     | Total |                   |
|-----------------------------------|----------------------------------|---------------------------------|-----------------------|------------------------|-------------------------------------------------|------------------------|-----------------------------------------------------|-------|-------------------|
|                                   | Is the case definition adequate? | Representativeness of the cases | Selection of Controls | Definition of Controls | controls on the basis of the design or analysis | Assessment of exposure | Same method of ascertainment for cases and controls |       | Non-response rate |
| Chan et al. 2017 <sup>11</sup>    | *                                | -                               | -                     | *                      | **                                              | *                      | *                                                   | *     | 7                 |
| Gomm et al. 2016 <sup>7</sup>     | *                                | *                               | -                     | *                      | *                                               | *                      | *                                                   | *     | 7                 |
| Imfeld et al. 2015 <sup>10</sup>  | *                                | -                               | -                     | *                      | **                                              | *                      | *                                                   | *     | 7                 |
| Wu et al. 2011 <sup>3</sup>       | *                                | -                               | -                     | *                      | **                                              | *                      | *                                                   | *     | 7                 |
| Wu et al. 2009 <sup>4</sup>       | *                                | *                               | -                     | *                      | *                                               | *                      | *                                                   | *     | 7                 |
| Lagnaoui et al. 2002 <sup>5</sup> | *                                | -                               | -                     | *                      | *                                               | *                      | *                                                   | *     | 6                 |

\*Indicates one point, \*\*Indicates two points, †Indicates no points.  
F/u: follow-up, NOS: New Castle Ottawa Scale.
